# Supplementary material for: Novel SrGd2Al2O7:Mn4+, Nd3+, and Yb3+ phosphors for c-Si solar cells
Source: Royal Society of Chemistry journal article supplement (doi:10.1039/d1dt00320h), 2021-01-01
Supplement: d1dt00320h1.pdf [file d1dt00320h1.pdf]

## Supporting Information

### Novel $\text{SrGd}_2\text{Al}_2\text{O}_7:\text{Mn}^{4+},\text{Nd}^{3+},\text{Yb}^{3+}$ phosphors for c-Si solar cells

Yonghui Xu,<sup>a, b</sup> Liang Zhang,<sup>a, b</sup> Langping Dong,<sup>a, b</sup> Shuwen Yin,<sup>a, b</sup> Xiudi Wu,<sup>a, b</sup> and

Hongpeng You<sup>a, b \*</sup>

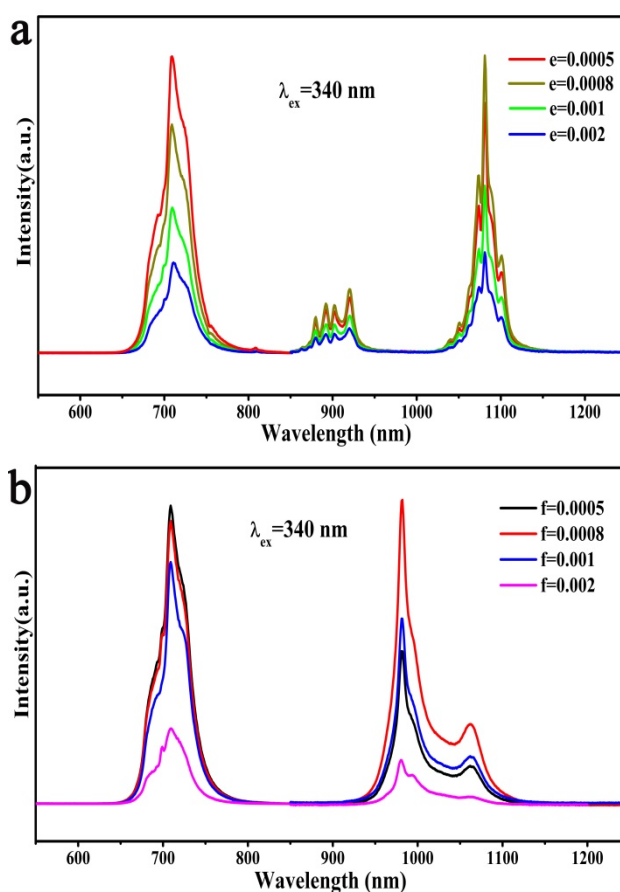

**Figure S1.** PL emission spectra of the different  $\text{Mn}^{4+}$  contents doped in the  $\text{SGA}:\text{eMn}^{4+}, 0.02\text{Nd}^{3+}$  (a) and  $\text{SGA}:\text{fMn}^{4+}, 0.02\text{Yb}^{3+}$  (b).

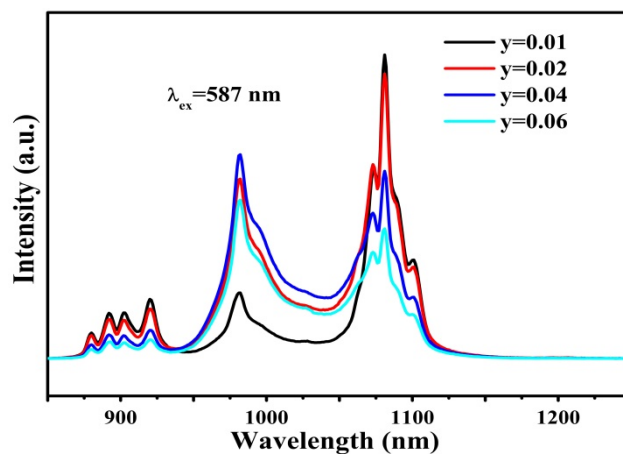

**Figure S2.** Variation of emission spectra of SGA:0.02Nd<sup>3+</sup>,yYb<sup>3+</sup> samples excited at 587 nm.

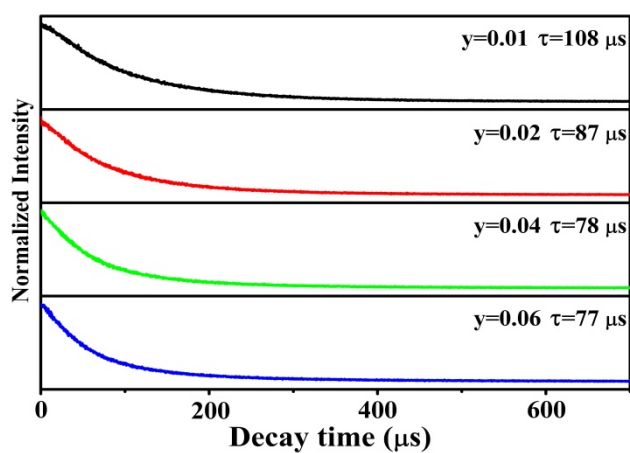

**Figure S3.** Decay curves ( $\lambda_{\text{ex}} = 587 \text{ nm}$ ,  $\lambda_{\text{em}} = 1081 \text{ nm}$ ) for Nd<sup>3+</sup> emissions in SGA: 0.02Nd<sup>3+</sup>,yYb<sup>3+</sup> ( $y = 0.01$ -0.06).

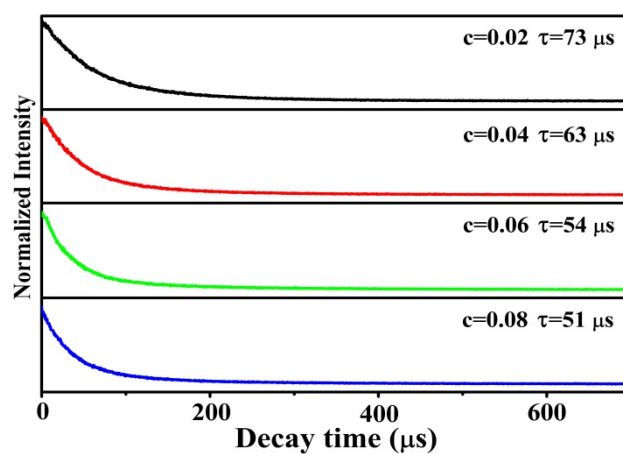

**Figure S4.** Decay curves ( $\lambda_{\text{ex}} = 587 \text{ nm}$ ,  $\lambda_{\text{em}} = 1081 \text{ nm}$ ) for  $\text{Nd}^{3+}$  emissions in SGA:0.0008 $\text{Mn}^{4+}$ ,0.02 $\text{Nd}^{3+}$ , $c\text{Yb}^{3+}$  ( $c = 0.02\text{-}0.08$ ).
